# Supplementary material for: Morphologically Diverse Micro- and Macrostructures Created via Solvent Evaporation-Induced Assembly of Fluorescent Spherical Particles in the Presence of Polyethylene Glycol Derivatives
Source: MDPI journal article supplement (doi:10.3390/molecules26144294), 2021-07-15
Supplement: s1 [file s1]

**Morphologically Diverse Micro- and Macrostructures Created via Solvent Evaporation-Induced Assembly of Fluorescent Spherical Particles in the Presence of Polyethylene Glycol Derivatives**

*Mina Han, Ikue Abe, Kazunori Matsuura, Yukikazu Takeoka, and Takahiro Seki*

Contents

**Figure S1.** SEM image of the sample obtained from the mPEG1000:Bu mixed system ( $f_{\text{mPEG1000}} = 50\%$ )

**Figure S2.** TEM and SEM images showing various microstructures formed by connecting the SPs through PEG2000

**Figure S3.** SEM images of mesh-like structures

**Figure S4.**  $^1\text{H}$  NMR, absorption and fluorescence spectra

**Figure S5.** LCM image of relatively photostable Bu spheres

**Figure S6.** Visible-light-triggered morphological deformation and rapid fluorescence intensity response

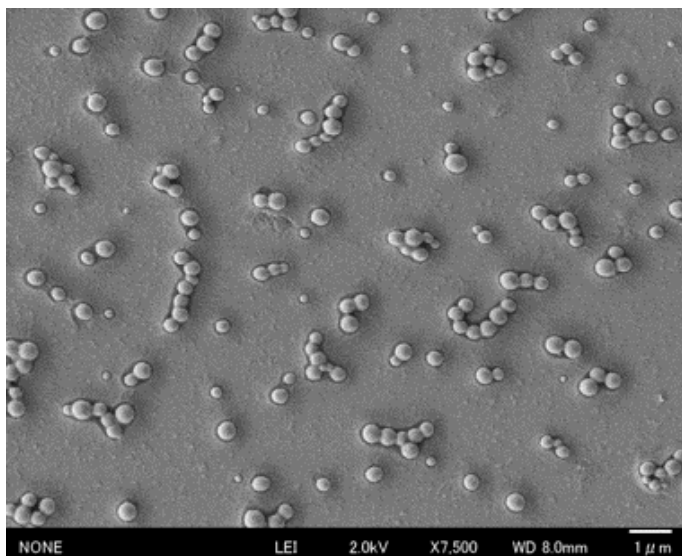

**Figure S1.** SEM image of the sample obtained from the mPEG1000:Bu mixed system ( $f_{\text{mPEG1000}} = 50\%$ ).

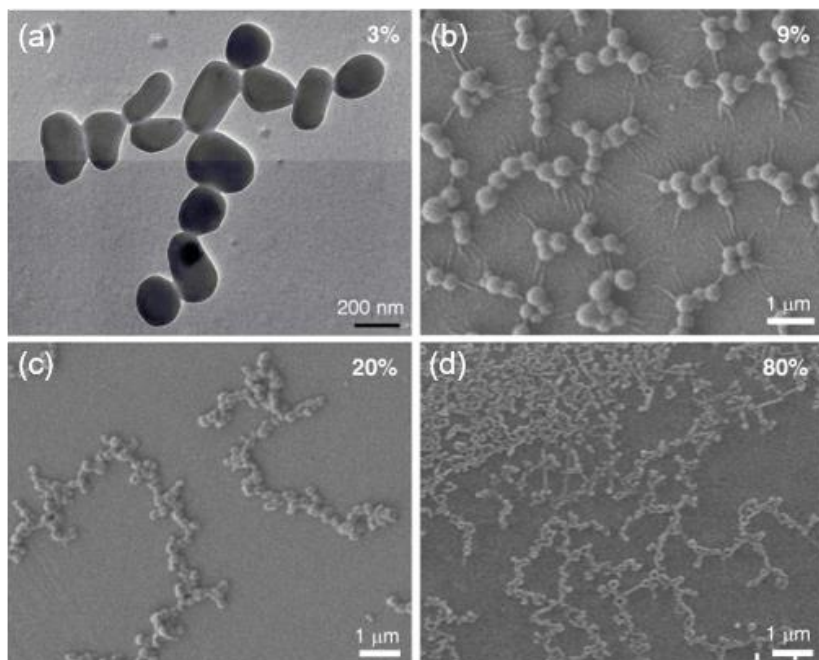

**Figure S2.** TEM and SEM images showing various microstructures formed by connecting the SPs through PEG2000.  $f_{\text{PEG2000}} =$  (a) 3%, (b) 9%, (c) 20%, and (d) 80%.

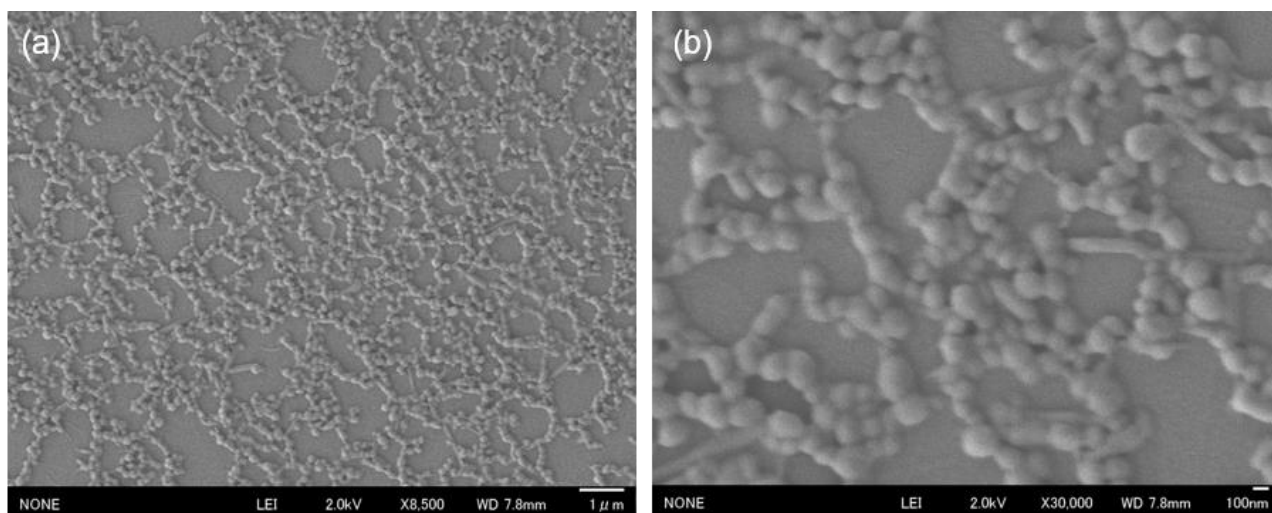

**Figure S3.** Mesh-like structures obtained from the mPEG1000:Bu mixed system ( $f_{\text{mPEG1000}} = 86\%$ ). (b) Magnified SEM image.

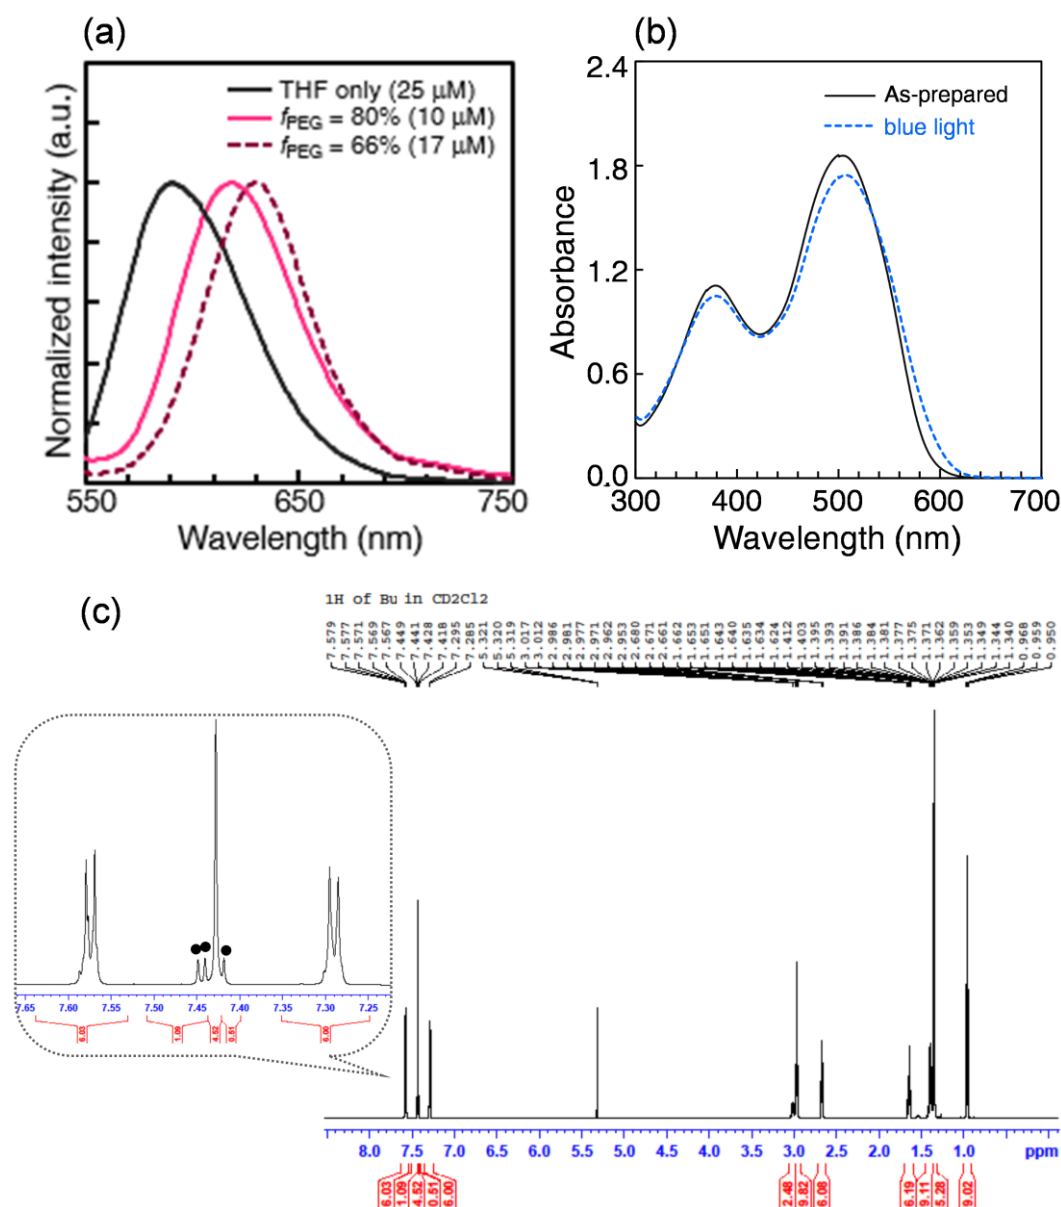

**Figure S4.** (a) Fluorescence spectra before and after the formation of the Bu SPs by the addition of the mPEG1000 H<sub>2</sub>O solution to the Bu THF solution. The obtained sample showed a fluorescence quantum yield as high as  $\sim 1.9\%$ , which was comparable to that of SPs without PEG. (b) Absorption spectral changes of Bu THF solution. (c)  $^1\text{H}$  NMR data taken after exposing the Bu sample to sunlight (in CD<sub>2</sub>Cl<sub>2</sub>). Three singlet peaks marked with filled circles appeared upon exposure to room light.

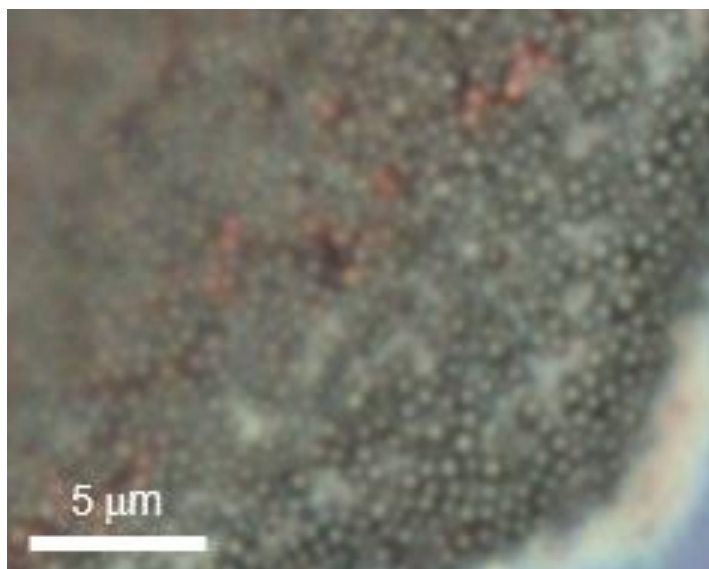

**Figure S5.** LCM image of relatively photostable Bu spheres. The round shape remained intact even after several LCM measurements.

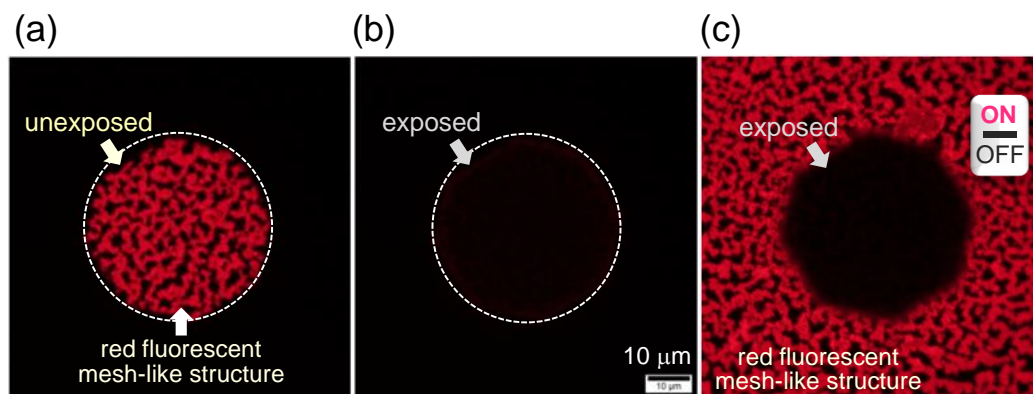

**Figure S6.** (a-c) FOM images of interconnected network structures taken before and after irradiation with green light (attached to FOM) for 5 seconds ( $\lambda_{\text{ex}} = 520\text{--}550\text{ nm}$ ). The dark parts in Figure S6b-c correspond to the light-induced melting of network structures.
