# Supplementary material for: Morphologically Diverse Micro- and Macrostructures Created via Solvent Evaporation-Induced Assembly of Fluorescent Spherical Particles in the Presence of Polyethylene Glycol Derivatives
Source: Molecules. 2021 Jul 15;26(14):4294. doi: 10.3390/molecules26144294 (PMC8304015; doi:10.3390/molecules26144294)
Supplement: Supplementary file 1 [file molecules-26-04294-s001.zip]

Archive with 5 entries (5 files):
- Movie 4_Fast light response. In-situ FOM of mesh-like structures observed during green light irradiation for 5 seconds.wmv
- 2_SM-Han.pdf
- Movie 1_Control Experiment in the absence of PEG_ The need of PEG is crucial at the border where solvents evaporate fast_[X400].MP4
- Movie 2_In the presence of PEG ready-made interconnected structures were stacked sideways.mp4
- Movie 3_In-situ OM observation of a giant interconnected necklace structure which floated at the air-liquid interface (fPEG = 80%)_[X400].mp4
